# Supplementary material for: From lignin to market: a technical and economic perspective of reductive depolymerization approaches
Source: Royal Society of Chemistry journal article supplement (doi:10.1039/d5gc02316e), 2025-01-01
Supplement: d5gc02316e1.pdf [file d5gc02316e1.pdf]

## Key assumptions in techno-economic assessment

**Table S1:** All values for RCF are taken from Arts et al. <sup>1</sup> and for RCD from Jusner et al. <sup>2</sup>, unless otherwise stated.

<sup>a</sup> Adapted from <sup>1</sup> for 0% solvent recycling, <sup>b</sup> Assuming improvement in lignin solubility from 47% to 70%, <sup>c</sup> Based on <sup>3</sup> and Flanders Industry Innovation NIBCON project report, <sup>d</sup> Based on <sup>4</sup>, <sup>e</sup> Assumption, <sup>f</sup> Based on Belgian labour data for 2022, <sup>g</sup> Based on Belgian corporate tax rate in 2024, <sup>h</sup> Adjusted from <sup>1</sup> using a 0.6 scaling factor and Chemical Engineering Plant Cost Index for 2023, <sup>i</sup> Based on <sup>5</sup>, with single reactor assumed instead of two reactors as in that article. Plant size adjusted with 0.6 scaling factor. Plant costs updated using Chemical engineering Plant Cost Index., <sup>j</sup> Assuming unit capital cost to be half of that in the Base case, <sup>k</sup> Based on average European Posted Contract Price for 2023-24 <sup>6</sup>, <sup>l</sup> Estimated clean hydrogen price in Europe in 2030, <sup>m</sup> Based on 2022 Belgium baseload electricity prices, <sup>n</sup> Based on data from Echemi <sup>7</sup>, as accessed in December 2024, <sup>o</sup> Based on ASPEN modelling.

| Parameter                                         | Value                     |                              |                   |                   |
|---------------------------------------------------|---------------------------|------------------------------|-------------------|-------------------|
|                                                   | RCF with liquor recycling | RCF without liquor recycling | RCD – Base        | RCD - Improved    |
| Feedstock                                         | Birch wood                | Birch wood                   | Hydrolysis lignin | Hydrolysis lignin |
| Solvent-feedstock ratio                           | 2                         | 10 <sup>a</sup>              | 14.3              | 6.7               |
| Feedstock to oil conversion (%)                   | 17.4                      | 17.4                         | 40                | 60 <sup>b</sup>   |
| Feedstock price (€/t)                             | 158                       | 158                          | 500               | 500               |
| Byproduct price (€/t) <sup>c</sup>                | 400                       | 400                          | 300               | 400               |
| Catalyst quantity (kg/kg/h)                       | 0.1                       | 0.1                          | 0.76              | 0.76              |
| Catalyst lifetime (y) <sup>d</sup>                | 0.08                      | 0.08                         | 0.08              | 0.08              |
| Operating hours (h/y)                             | 8000                      | 8000                         | 8000              | 8000              |
| Solvent recovery (%)                              | 99.9                      | 99.9                         | 99.9              | 99.9              |
| Hydrogen recycling (%) <sup>e</sup>               | 90                        | 90                           | 90                | 90                |
| Feedstock temperature (°C) <sup>e</sup>           | 20                        | 20                           | 20                | 20                |
| Salary per personnel (€/y) <sup>f</sup>           | 73,000                    | 73,000                       | 73,000            | 73,000            |
| Maintenance cost (% of capital cost) <sup>e</sup> | 1.5                       | 1.5                          | 1.5               | 1.5               |
| Repair cost (% of capital cost) <sup>e</sup>      | 1                         | 1                            | 1                 | 1                 |
| Insurance cost (% of capital cost) <sup>e</sup>   | 0.5                       | 0.5                          | 0.5               | 0.5               |
| Weighted Average Cost of Capital (%) <sup>e</sup> | 6                         | 6                            | 6                 | 6                 |
| Economic lifetime (y) <sup>e</sup>                | 20                        | 20                           | 20                | 20                |
| Corporate tax rate in Belgium (%) <sup>g</sup>    | 25                        | 25                           | 25                | 25                |
| Capital costs (million €)                         | 161 <sup>h</sup>          | 205 <sup>h</sup>             | 338 <sup>i</sup>  | 133 <sup>j</sup>  |
| Methanol price (€/t) <sup>k</sup>                 | 500                       | 500                          | 500               | 500               |
| Hydrogen price (€/t) <sup>l</sup>                 | 2000                      | 2000                         | 2000              | 2000              |
| Catalyst price (€/t) <sup>d</sup>                 | 210,000                   | 210,000                      | 42,000            | 42,000            |
| Electricity price (€/MWh) <sup>m</sup>            | 180                       | 180                          | 180               | 180               |
| Water price (€/m <sup>3</sup> )                   | 0.5                       | 0.5                          | 0.5               | 0.5               |
| Ethyl acetate price (€/t) <sup>n</sup>            | 1200                      | 1200                         | -                 | -                 |
| Steam price (€/t) <sup>o</sup>                    | 18.1                      | 18.1                         | 18.1              | 18.1              |

## References

- 1 W. Arts, K. Van Aelst, E. Cooreman, J. Van Aelst, S. Van den Bosch and B. F. Sels, *Energy Environ. Sci.*, 2023, **16**, 2518–2539.
- 2 P. Jusner, B. Sridharan, B. Daelemans, A. Mukherjee, M. Van Dael, V. Polizzi, K. Servaes, K. Elst, K. Vanbroekhoven and E. Feghali, *Chem. Eng. J.*, 2024, **499**, 156474.
- 3 M. Tschulkow, T. Compernelle, S. Van den Bosch, J. Van Aelst, I. Storms, M. Van Dael, G. Van den Bossche, B. Sels and S. Van Passel, *J. Cleaner Prod.*, 2020, **266**, 122022.
- 4 A. W. Bartling, M. L. Stone, R. J. Hanes, A. Bhatt, Y. Zhang, M. J. Bidy, R. Davis, J. S. Kruger, N. E. Thornburg, J. S. Luterbacher, R. Rinaldi, J. S. M. Samec, B. F. Sels, Y. Román-Leshkov and G. T. Beckham, *Energy Environ. Sci.*, 2021, **14**, 4147–4168.
- 5 R. M. O’Dea, P. A. Pranda, Y. Luo, A. Amitrano, E. O. Ebikade, E. R. Gottlieb, O. Ajao, M. Benali, D. G. Vlachos, M. Ierapetritou and T. H. Epps, *Sci. Adv.*, 2022, **8**, eabj7523.
- 6 Pricing, <https://www.methanex.com/about-methanol/pricing/>, (accessed 4 April 2025).
- 7 Ethyl Acetate Market Price & Analysis, [https://www.echemi.com/productsInformation/pid\\_Seven5613-ethyl-acetate.html](https://www.echemi.com/productsInformation/pid_Seven5613-ethyl-acetate.html), (accessed 20 December 2024).
